# Supplementary material for: The contribution of the histopathological examination to the diagnosis of adverse local tissue reactions in arthroplasty
Source: PubMed Central journal article supplement — EFORT Open Rev. 2021 Jun 28;6(6):399–419. doi: 10.1302/2058-5241.6.210013 (PMC8246109; doi:10.1302/2058-5241.6.210013), 2021-06-28
Supplement: eor-6-399-s002.pdf [file eor-6-399-s002.pdf]

## Appendix II

### Role of metallic particles and ions in ALTR/ARMD

It is important to briefly discuss here the dual role of metallic ions and particles in the onset and progression of the ALTR/ARMD reaction in the periprosthetic soft tissue and bone, which is also one of the most interesting topics of research regarding the occurrence of ALTR/ARMD associated with metallic wear debris generated at the bearing surface and/or modular junctions by various mechanisms. Recent, comprehensive reviews of the literature have provided valuable hypotheses of cell damage and toxicological aspects related to ALTR/ARMD and suggested lines of further research in this important area of interaction between metallic nanoparticulate wear debris and host [1-3]. The local adverse effects of metallic ions/particles can be summarized in three main categories: (a) macrophage toxicity with formation of oxidative stress and cell death; (b) lymphocyte-dominant reaction associated or not with transmural tissue necrosis and myotoxicity; (c) stimulation of macrophages leading to periprosthetic bone invasion with a variable degree of osteolysis possibly leading to aseptic loosening of implant components. The early literature on ALTR/ARMD focused on the MoM bearing surface of second generation HRA and THA and the differences in wear debris were mainly attributed to the bioreactivity of CoCr metallic nanoparticles and generation of free metallic ions interacting with synovial fluid and/or intracellular proteins forming organometallic complexes of undetermined and untested immunogenicity [4]. Around 2011, the attention shifted to the corrosion particles generated at the head/neck modular junction of MoM THA with MAS and the CoCr DMN/stem [5-8].

Although the role of size, composition, oxidative stability, and dose of the particles with the addition of more subtle elements such the composition of absorbed proteins has been considered fundamental in the biology of the cell reaction [9], the prevalent hypothesis of the onset of the lymphocytic dominant reaction is centered on the role of cobalt ions with quantitative correlation of the Co and Cr ion level in blood, synovial fluid, and periprosthetic soft tissue [10-12] with host response by the interplay of innate and adaptive immunity [13]. There is a general consensus in the literature that the presence of Co rich particles and/or Co ions are important for the development some aspects of the ALTR/ARMD: (a) it is a relevant agent in the development of ALTR/ARMD [14] with the potential to activate TLR4 on local immune cells similar to the response to bacterial endotoxin [15], (b) it generates reactive oxidase species (ROS) with subsequent oxidative stress of the macrophages and their death [16] and possibly affecting T-cell activation as shown *in vitro* [17]. A recent study has shown generation of ROS after exposure to Co ions and not to metallic nanoparticles *in vitro* [18]: however, experimental conditions may not reflect the complexity of the factors *in vivo*, especially if different wear particles are generated at MoM bearing surface and metallic junctions and interact with the joint fluid before being phagocytized by macrophages.

The role of soluble ions has been favored over particulate cobalt-alloy implant debris for the release of crucial cytokines for ALTR/ARMD [19] in spite of several reports showing lack of correlation between pseudotumors and metallic ion concentrations or Co to Cr ratio [20-22]. This indicates the important role of the variability in the chemical speciation of the particles released from different arthroplasty implants. It needs to be noted that the predominantly lymphocytic type of reaction with transmural soft tissue necrosis was not described before the use of second-generation MoM HRA and THA implants and Non-MoM THA with CoCr DMN, even in cases of catastrophic accumulation of abrasion metallic wear debris and very high blood and synovial fluid concentration of Co and less of Cr ions with systemic toxicity. Therefore, it seems reasonable to assume that metallic debris generated by various corrosion

mechanisms is necessary for this type of ALTR/ARMD and could also play a role in the occurrence of macrophage-mediated osteolysis with aseptic loosening of the implant components.

More recently, cohorts of patients implanted with a model of non-MoM THA with CoCr DMN and TMZF stem have shown a high prevalence of a lymphocytic-dominant reaction with soft tissue necrosis and slightly increased levels of serum Co (mean 5.4 and 8.6 µg/L) and Cr ions (mean 2.1 and 1.8 µg/L) [23, 24] with a variable loss of material from the neck piece taper junction [25], also documented radiologically [26] and histologically [27, 28]. This implant generated corrosion metallic wear only at the neck/stem modular junction without any additional wear from the bearing surface [29]. Particle wear analysis has shown aggregates of nanosize corrosion particles and correlation between complexity of particle composition and degree of synovial macrophage and lymphocytic inflammation in MoM HRA, MoM LHTHA w/wo CoCr MAS, and non-MoM THA with CoCr DMN and TMZF stem [29]. These data point towards an unprecedented occurrence of particle-related toxicity and immunogenicity in the cohorts of patients implanted with this configuration, regardless of patients' sex and age. The importance of the metal particles over the ions is also corroborated, although to a lesser extent, by the toxicity/immunogenicity of the corrosion particle aggregates generated at the head/neck junction of MoM LHTHA with or without CoCrMAS and non-MoM THA with metallic heads and various metallic neck tapers [30], and total knee implants with modular femoral component [31, 32].

Serum protein adsorption can vary according to particle physical and chemical features [33] and studies are needed to elucidate how metallic wear particles/ions generated by various types of corrosion exhibit a higher degree of local toxicity and immunogenicity than conventional metallic particles. Studies on the protein corona coating the nanoparticles and nanoparticle aggregates could shed light on pathways for the different occurrence of the lymphocytic dominant ALTR/ARMD [34-38] as well as the characterization of wear particles and metalloproteins in joint synovial fluid by different methods [39, 40]. Different corrosion modes dictated by different metal alloy microstructure can be important in the different immunogenicity/toxicity of wear particles of similar size and metal composition [41]. This tribological analysis might also predict which type of wear particles might be released *in vivo* and possibly their effect with pre-marketing studies performed with the aid of bioreactors [42].

## References

1. **Granchi D, Savarino LM, Ciapetti, G, Baldini, N.** Biological effects of metal degradation in hip arthroplasties. *Crit Rev Toxicol* 2020;48(2), 170–193.doi:10.1080/10408444.2017.1392927
2. **Eltit F, Wang Q, Wang R.** Mechanisms of Adverse Local Tissue Reactions to Hip Implants. *Front Bioeng Biotechnol* 2019;7:176. doi: 10.3389/fbioe.2019.00176
3. **Kovochich M, Finley BL, Novick R, Monnot AD, Donovan E, Unice KM, Ernest S, Fung ES, Fung D, Paustenbach DJ.** Understanding outcomes and toxicological aspects of second-generation metal-on-metal hip implants: a state-of-the-art review. *Crit Rev Toxicol* 2019;doi.org/10.1080/10408444.2018.1563048.
4. **Jacobs JJ, Campbell PA, Konttinen YT.** How has the biologic reaction to wear particles changed with newer bearing surfaces? *Implant Wear Symposium 2007 Biologic Work Group. J Am Acad Orthop Surg* 2008;16 Suppl 1:49-55.
5. **Gill IP, Webb J, Sloan K, Beaver RJ.** Corrosion at the neck-stem junction as a cause of metal ion release and pseudotumour formation. *J Bone Joint Surg Br* 2012;94:895-900.
6. **Cooper HJ, Urban RM, Wixson RL, Meneghini RM, Jacobs JJ.** Adverse local tissue reaction arising from corrosion at the femoral neck-body junction in a dual-taper stem with a cobalt-chromium modular neck. *J Bone Joint Surg Am* 2013;95:865-72.

7. **Srinivasan A, Jung E, Levine BR.** Modularity of the femoral component in total hip arthroplasty. *J Am Acad Orthop Surg* 2012;20:214-22
8. **Lavigne M, Belzile EL, Roy A, Morin F, Amzica T, and Vendittoli PA.** Comparison of whole-blood metal ion levels in four types of metal-on-metal large-diameter femoral head total hip arthroplasty: the potential influence of the adapter sleeve. *J Bone Joint Surg Am* 2011;93 Suppl 2:128-36.
9. **Lawrence H, Deehan D, Holland J, Kirby J, Tyson-Capper A.** The immunobiology of cobalt. Demonstration of a potential aetiology for inflammatory pseudotumours after metal-on-metal replacement of the hip. *Bone Joint J* 2014;96-B:1172-77.
10. **Grammatopoulos G, Munemoto M, Pollalis A, Athanasou NA.** Correlation of serum metal ion levels with pathological changes of ARMD in failed metal-on-metal-hip-resurfacing arthroplasties. *Arch Orthop Trauma Surg.* 2017;137:1129-37.
11. **Eltit F, Assiri A, Garbuz D, Duncan C, Masri B, Greidanus N, et al.** Adverse reactions to metal on polyethylene implants: highly destructive lesions related to elevated concentration of cobalt and chromium in synovial fluid. *J Biomed Mater Res A* 2017;105:1876-86.
12. **Langton DJ, Sidaginamale RP, Joyce TJ, Bowsher JG, Holland JP, Deehan D, et al.** Aseptic lymphocyte-dominated vasculitis associated lesions are related to changes in metal ion handling in the joint capsules of metal-on-metal hip arthroplasties. *Bone Joint Res* 2018;7:388-96.
13. **McKee AS, Fontenot AP.** Interplay of innate and adaptive immunity in metal-induced hypersensitivity. *Curr Opin Immunol* 2016;42:25-30.
14. **Hart AJ, Quinn PD, Lali F, Sampson B, Skinner JA, Powell JJ, et al.** Cobalt from metal-on-metal hip replacements may be the clinically relevant active agent responsible for periprosthetic tissue reactions. *Acta Biomaterialia* 2012;8:3865-73.
15. **Tyson-Capper AJ, Lawrence H, Holland JP, et al.** Metal-on-metal hips: cobalt can induce an endotoxin-like response. *Ann Rheum Dis* 2013;72:460-461.
16. **Scharf B, Clement CC, Zolla V, Perino G, Yan B, Elci SG, et al.** Molecular analysis of chromium and cobalt-related toxicity. *Sci Rep* 2014;4:5729.
17. **Hailer NP, Bengtsson M, Lundberg C, Milbrink J.** High metal ion levels after use of the ASR device correlate with development of pseudotumors and t-cell activation. *Clin Orthop Relat Res* 2014;472:953-61.
18. **Chamaon K, Schönfeld P, Awiszus F, Bertrand J, Lohmann CH.** Ionic cobalt but not metal particles induces ROS generation in immune cells in vitro. *J Biomed Mater Res B Appl Biomater* 2019;107:1246-53.
19. **Caicedo MS, Pennekamp PH, McAllister K, Jacobs JJ, Hallab NJ.** Soluble ions more than particulate cobalt-alloy implant debris induce monocyte costimulatory molecule expression and release of proinflammatory cytokines critical to metal-induced lymphocyte reactivity. *J Biomed Mater Res A* 2010;93:1312-21.
20. **Hjorth MH, Stilling M, Søballe K, Bolvig HL, Thyssen JP, Mechlenburg I, Jakobsen SS.** No association between pseudotumors, high serum metal-ion levels and metal hypersensitivity in large-head metal-on-metal total hip arthroplasty at 5-7-year follow-up. *Skeletal Radiol* 2016;45:115-125.
21. **Liow MHL, Urish KL, Preffer FI, Nielson GP, Kwon YM.** Metal ion levels are not correlated with histopathology of adverse local tissue reactions in taper corrosion of total hip arthroplasty. *J Arthroplasty* 2016;31:1797-1802.
22. **Fehring TK, Carter JL, Fehring KA, Odum SM, Griffin WL.** Cobalt to chromium ratio is not a key marker for adverse local tissue reaction (ALTR) in metal on metal hips. *J Arthroplasty* 2015;30 Suppl 1:107-09.

23. **Meftah M, Haleem AM, Burn MB, Smith KM, Incavo SJ.** Early corrosion-related failure of the rejuvenate modular total hip replacement. *J Bone Joint Surg Am* 2014;96:481-7.
24. **Nawabi DH, Do HT, Ruel A, Lurie B, Elpers ME, Wright T, et al.** Comprehensive Analysis of a Recalled Modular Total Hip System and Recommendations for Management. *J Bone Joint Surg Am* 2016;98:40-7.
25. **Buente D, Huber G, Bishop N, Morlock M.** Quantification of material loss from the neck piece taper junctions of a bimodular primary hip prosthesis. A retrieval study from 27 failed Rejuvenate bimodular hip arthroplasties. *Bone Joint J Br* 2015;97:1350-357.
26. **Burge AJ, Gold SL, Lurie B, Nawabi DH, Fields KG, Koff MF et al.** MR imaging of adverse local tissue reactions around rejuvenate modular dual-taper stems. *Radiology* 2015;277:142-50.
27. **Perino G, Ricciardi BF, Jerabek SA, Martignoni G, Wilner G, Maass D, et al.** Implant based differences in adverse local tissue reaction in failed total hip arthroplasties: a morphological and immunohistochemical study. *BMC Clin Pathol* 2014;14:39. doi: 10.1186/1472-6890-14-39.
28. **Ricciardi B, Nocon AA, Jerabek SA, Wilner G, Kaplowitz E, Goldring SR, et al.** Histopathological characterization of corrosion product associated adverse local tissue reaction in hip implants: a study of 285 cases. *BMC Clin Pathol* 2016;16:3. doi: 10.1186/s12907-016-0025-9.
29. **Di Laura A, Quinn PD, Panagiotopoulou VC, Hothi HS, Henckel J, Powell JJ, et al.** The chemical form of metal species released from corroded taper junctions of hip implants: synchrotron analysis of patient tissue. *Sci Rep* 2017;7:10952 DOI:10.1038/s41598-017-11225-w.
30. **Mistry JB, Chughtai M, Elmallah RK, Diedrich A, Le S, Thomas M, Mont MA.** Trunnionosis in total hip arthroplasty: a review. *J Orthop Traumatol* 2016;17:1-6.
31. **Arnholt C, Donald DW, Tohfafarosh M, Gilbert JL, Rimnac CL, Kurtz SM, the Implant Research Writing Committee, Klein G, Mont MA, Parvizi J, Cates HE, Lee GC, Malkani A, Kraay M.** Mechanically assisted taper corrosion in modular TKA. *J Arthroplasty* 2014;29 Suppl 9:205–08.
32. **Christiner T, Pabbruwe MB, Kop AM, Parry J, Clark G, Collopy, D.** Taper Corrosion and Adverse Local Tissue Reactions in Patients with a Modular Knee Prosthesis. *JBJS Open Access* 2018;1.doi:10.2106/jbjs.oe.18.00019.
33. **Reddy A, Caicedo MS, Samelko L, Jacobs JJ, Hallab NJ.** Implant debris particle size affects serum protein adsorption which may contribute to particle size-based bioreactivity differences. *J Long Term Eff Med Implants* 2014;24:77-88.
34. **Hadjidemetriou M, Kostarelos K.** Nanomedicine: Evolution of the nanoparticle corona. *Nat Nanotechnol* 2017;12:288-90.
35. **Monopoli MP, Åberg C, Salvati A, Dawson KA.** Biomolecular coronas provide the biological identity of nanosized materials. *Nat Nanotechnol* 2012;7:779-86.
36. **Kelly MP, Åberg C, Polo E, O'Connell A, Cookman** nanoparticles corona and undergo dynamic exchange in vivo. *Nat Nanotechnol* 2015;10:472-9.
37. **Fleischer CC, Payne CK.** Nanoparticle-cell interactions: molecular structure of the protein corona and cellular outcomes. *Acc Chem Res* 2014;47:2651-659.
38. **Chen F, Wang G, Griffin JI, Breneman B, Banda NK, Holers MV, et al.** Complement proteins bind to nanoparticle protein. *Nat Nanotechnol* 2017;12:387-93.
39. **Loeschner K, Harrington CF, Kearney JL, Langton DJ, Larsen EH.** Feasibility of asymmetric flow field-flow fractionation coupled to ICP-MS for the characterization of wear metal particles and metalloproteins in biofluids from hip replacement patients. *Anal Bioanal Chem* 2015;407:4541-54.
40. **Lo Giudice M C, Herda LM, Polo E, Dawson KA.** In situ characterization of nanoparticle biomolecular interactions in complex biological media by flow cytometry. *Nature Communications* 2016;7,13475.doi:10.1038/ncomms13475.

41. **Pourzal R, Hall DJ, Ehrich J, Mc Carthy, SM, Mathew MT, Jacobs, JJ, Urban RM.** Alloy microstructure dictates corrosion modes in THA modular junctions. *Clin Orthop Relat Res.* 2017;475:3026-43.
42. **Pourzal R, Cichon R, Mathew MT, Pacione CA, Fischer A, Hallab N, Wimmer MA.** Design of a tribocorrosion bioreactor for the analysis of immune cell response to in situ generated wear products. *J Long Term Eff Med Implants* 2014;24: 65-76.
